# Supplementary material
Source: publisher figshare collection journal article supplement (https://acs.figshare.com/ndownloader/files/4590088)
Supplement: Supplementary file 1 [file 4590088]

## Supporting Information

### Kinetic analysis of arsenic-metalation of human metallothionein: Significance of the two-domain structure.

Thanh T. Ngu, Alexandria Easton and Martin J. Stillman\*

*\*The Department of Chemistry, The University of Western Ontario  
London, Ontario, Canada, N6A 5B7*

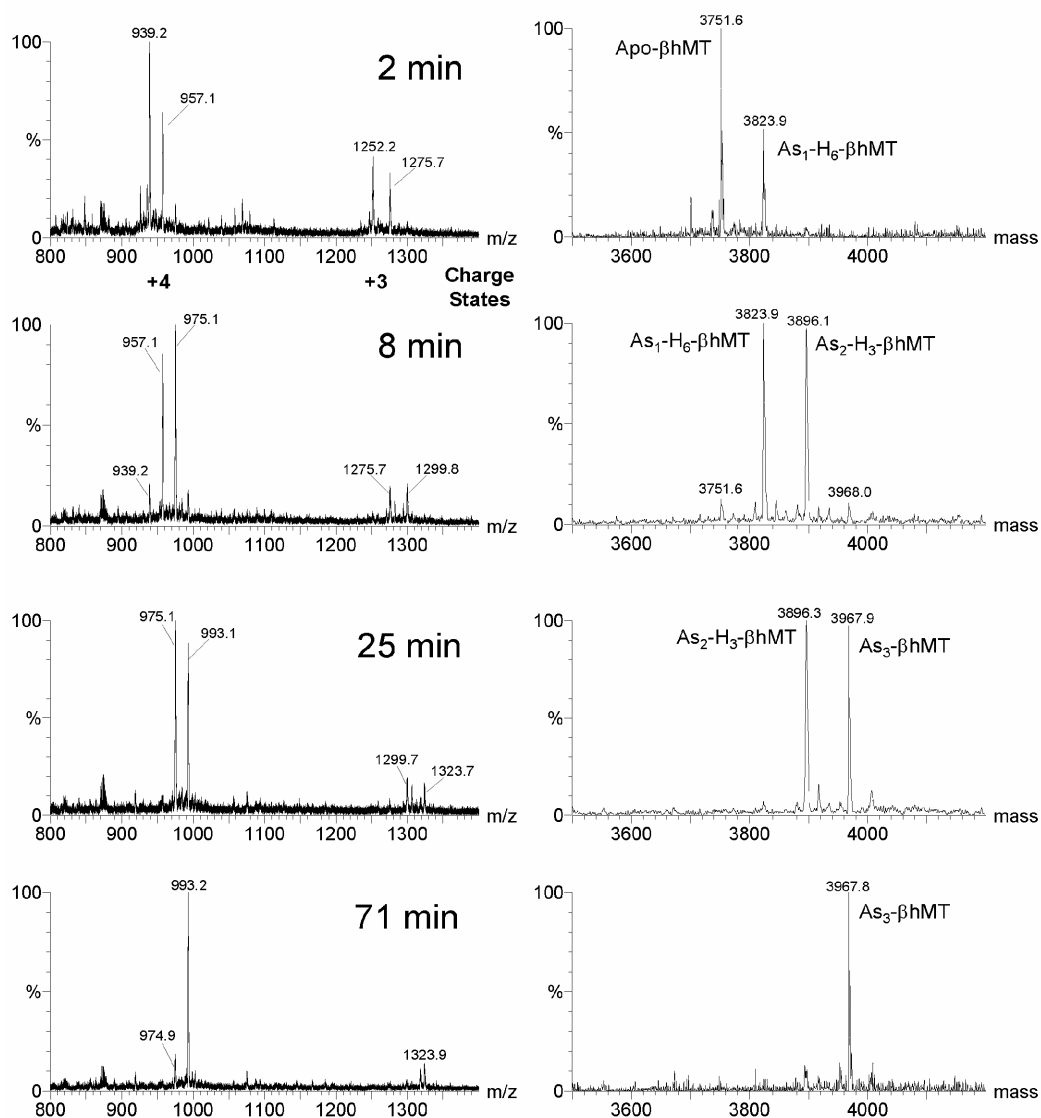

Figure S1. Time dependence of the ESI mass spectra of 30  $\mu$ M apo-βhMT in the presence  $\text{As}^{3+}$  in a stoichiometric ratio of 15:1 for  $\text{As}^{3+}$  : βhMT. The sample was continuously monitored using ESI-MS for over 80 minutes at 296 K and pH 3.5.

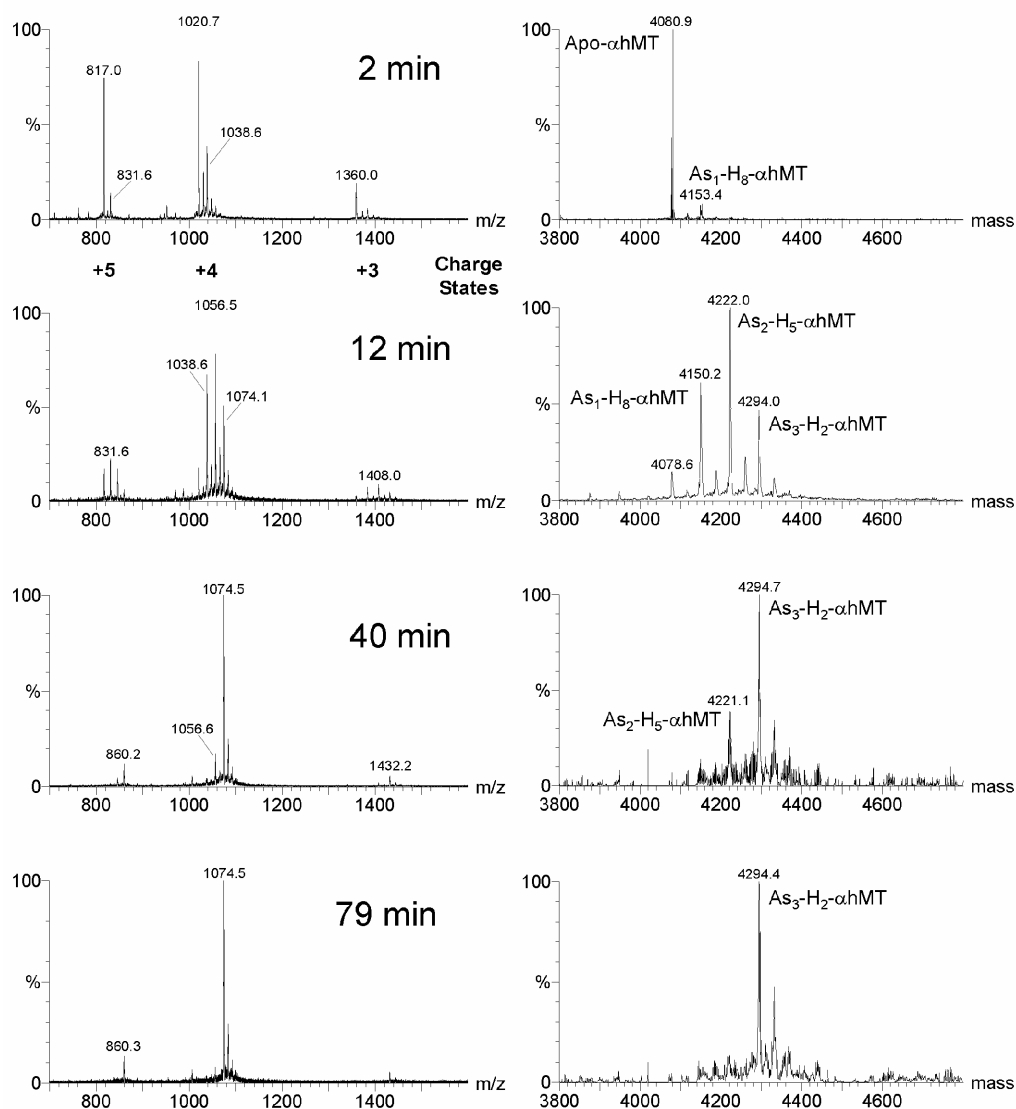

Figure S2. Time dependence of the ESI mass spectra of 23  $\mu\text{M}$  apo- $\alpha\text{hMT}$  in the presence  $\text{As}^{3+}$  in a stoichiometric ratio of 10:1 for  $\text{As}^{3+} : \alpha\text{hMT}$ . The sample was continuously monitored using ESI-MS for over 80 minutes at 296 K and pH 3.5.

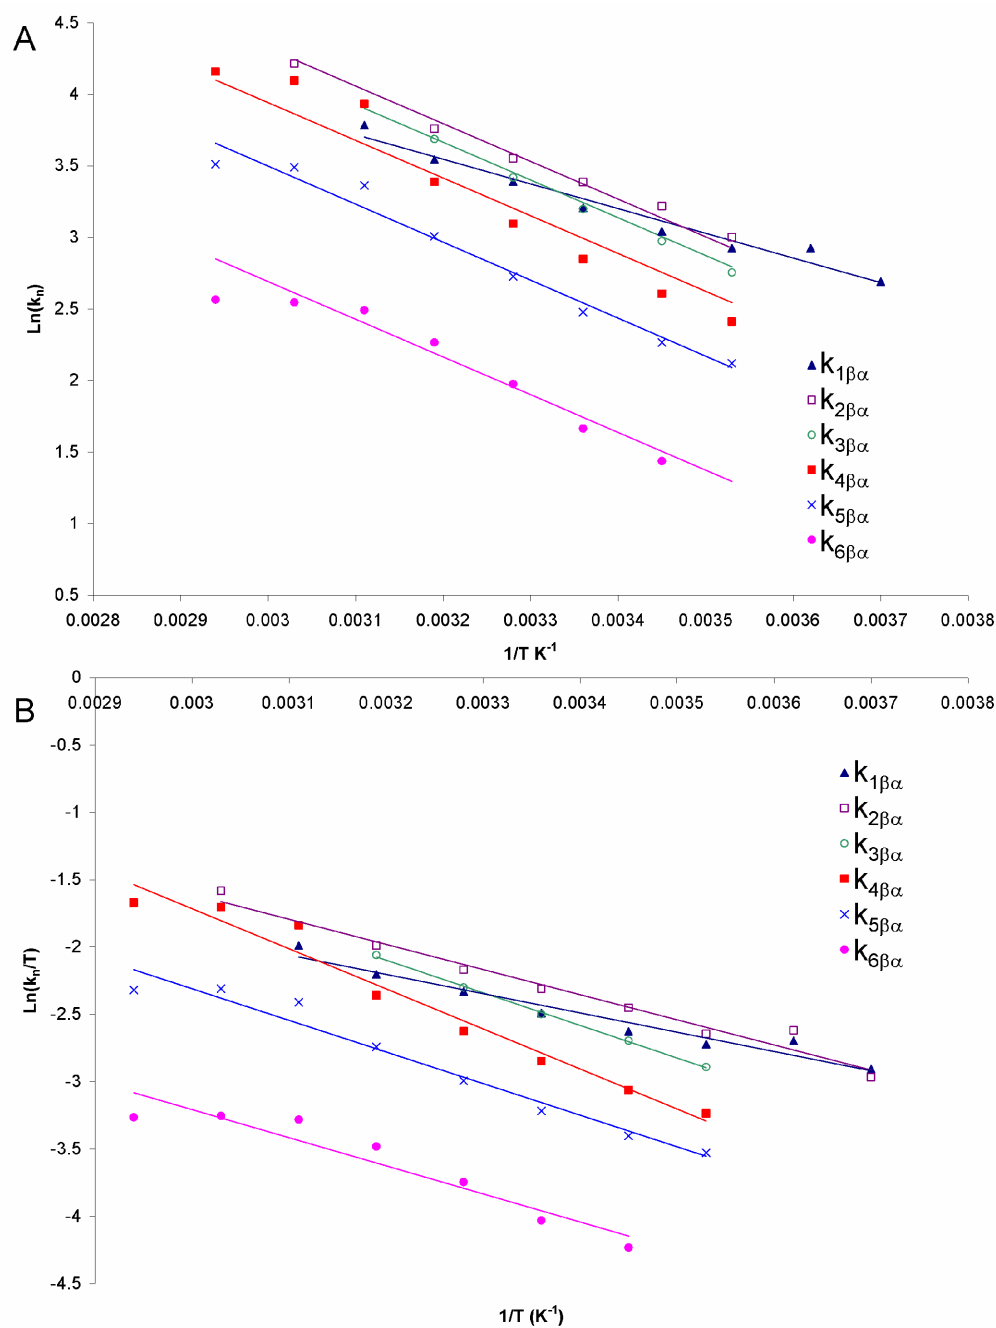

**Figure S3** Plots of  $\text{Ln}(k_n)$  vs  $1/T$  ( $K^{-1}$ ) (A) and  $\text{Ln}(k_n/T)$  vs  $1/T$  ( $K^{-1}$ ) (B) for  $\beta\alpha$ MT species, where  $n = 1-6$  as shown on Scheme 1.
